# Supplementary material for: Aligned packaging of in situ grown CsPbBr3 nanorods within polystyrene nanofibers for enhanced polarized luminescence properties
Source: Royal Society of Chemistry journal article supplement (doi:10.1039/d1tc00321f), 2021-01-01
Supplement: d1tc00321f1.pdf [file d1tc00321f1.pdf]

## Supporting Information

### **Aligned Packaging of *in-situ* Grown CsPbBr<sub>3</sub> Nanorods within Polystyrene Nanofibers for Enhanced Polarized Luminescence Properties**

*Hui Fu*<sup>1,2</sup>, *Huilin Hou*<sup>2</sup>, *Zhi Fang*<sup>2</sup>, *Chaoyi Chen*<sup>1</sup>, *Weiyu Yang*<sup>2</sup>, *Junqi*

*Li*<sup>1,\*</sup>, and *Jinju Zheng*<sup>2,\*</sup>

<sup>1</sup> College of Material and Metallurgy, Guizhou University, Guiyang, 550025, P. R.  
China

<sup>2</sup> Institute of Materials, Ningbo University of Technology, Ningbo, 315211, P. R.  
China

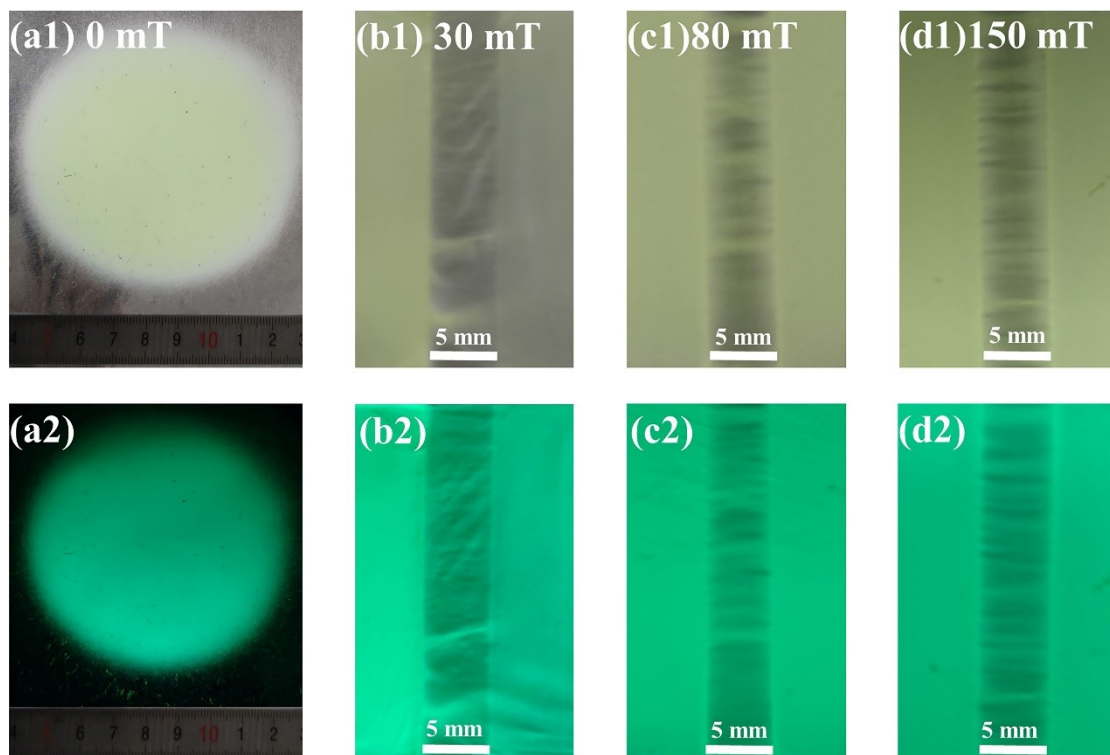

**Fig. S1** (a-d) Photographs of CsPbBr<sub>3</sub> NR@PS membranes prepared with different magnetic field strengths under daylight (top) and UV irradiation (bottom).

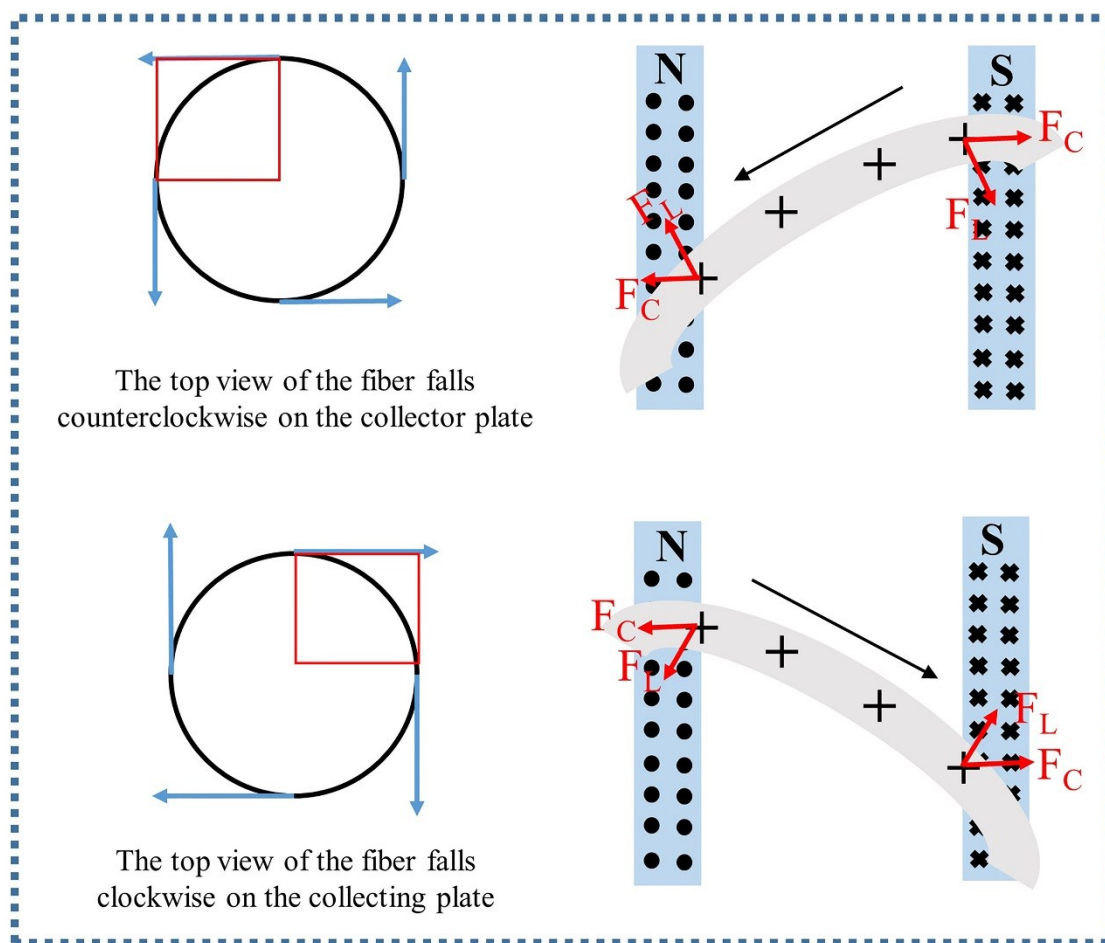

**Fig. S2** Mechanism diagram of the fiber macro-orientation in the membrane with the assistant of the magnetic field force.

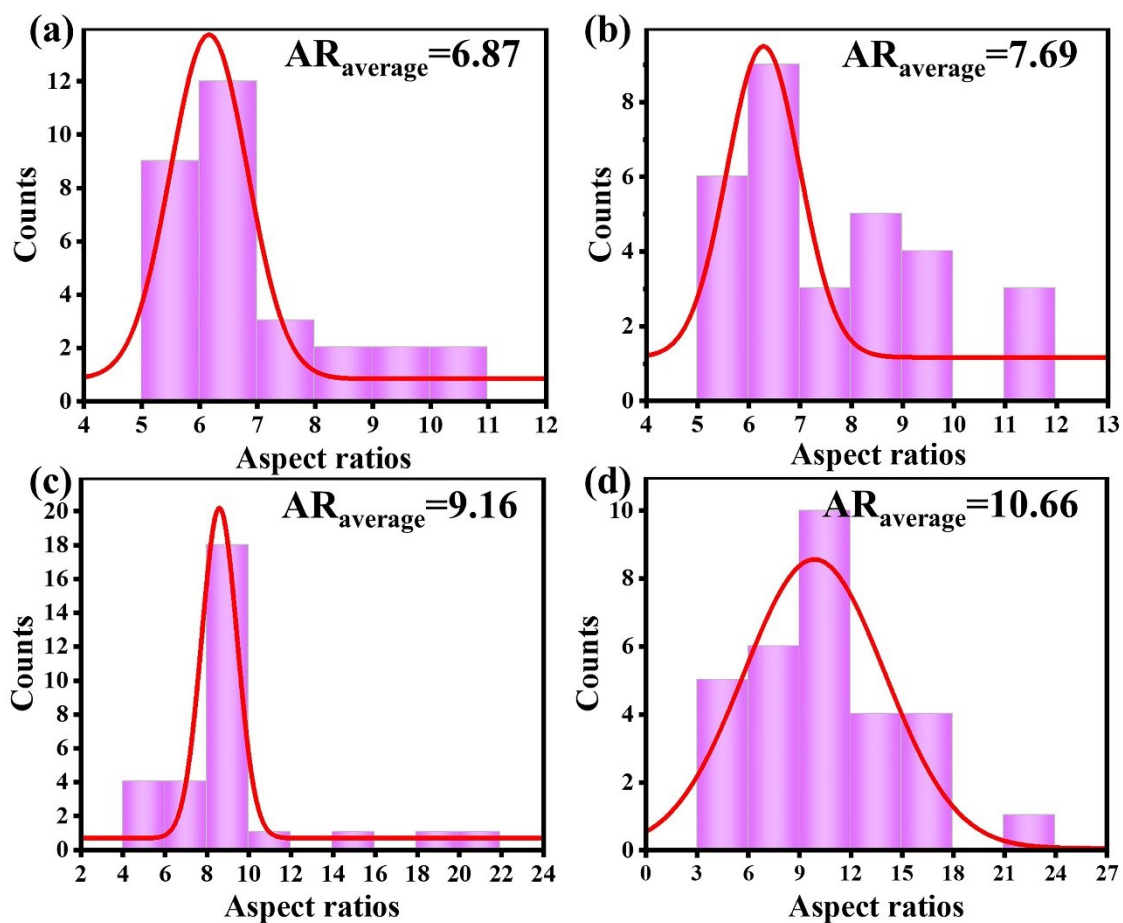

**Fig. S3** (a-d) The aspect ratios distribution histograms for CsPbBr<sub>3</sub> NR@PS nanofibers prepared with different magnetic field strengths. (a): 0 mT; (b): 30 mT; (c): 80 mT; (d): 150 mT.

**Table S1** Aspect ratios (AR) of the CsPbBr<sub>3</sub> NRs prepared with different magnetic field strengths

| <b>Sample</b> | <b>Fiber diameter<sub>avg</sub></b><br><b>(nm)</b> | <b>Nanorod diameter<sub>avg</sub></b><br><b>(nm)</b> | <b>Nanorod length<sub>avg</sub></b><br><b>(nm)</b> | <b>AR<sub>avg</sub></b> |
|---------------|----------------------------------------------------|------------------------------------------------------|----------------------------------------------------|-------------------------|
| 0 mT          | 600                                                | 25                                                   | 171                                                | 6.87                    |
| 30 mT         | 540                                                | 24                                                   | 178                                                | 7.69                    |
| 80 mT         | 491                                                | 22                                                   | 180                                                | 9.16                    |
| 150 mT        | 428                                                | 23                                                   | 229                                                | 10.66                   |

**Table S2** Overview of aspect ratios and polarization ratios of halide perovskite nanocrystals coated by polymer

| Materials                   | Synthetic method                                                                    | AR   | Macroscopic orientation | $P_{em}$ | $P_{ex}$  | Size (cm <sup>2</sup> ) | Ref.      |
|-----------------------------|-------------------------------------------------------------------------------------|------|-------------------------|----------|-----------|-------------------------|-----------|
| CsPbBr <sub>3</sub> NR@PS   | Magnetic field assisted electrospinning                                             | 10.6 | Yes                     | 0.23     |           | 0.5×10                  | This work |
| CsPbBr <sub>3</sub> NR@PS   | Electrospinning                                                                     | 7    | No                      | ~        | ~         | ~                       | 1         |
| MAPbBr <sub>3</sub> NR@PVA  | Electrospinning (Parallel positioned conductor strips with an air gap as collector) | 6    | Yes                     | ~        | 0.42±0.03 | 0.5×2                   | 2         |
| CsPbBr <sub>3</sub> NR@PU   | Electrospinning (Parallel positioned conductor strips with an air gap as collector) | ~    | Yes                     | 0.3      | ~         | Centimeter level        | 3         |
| MAPbBr <sub>3</sub> NR@PVDF | Drop-cast stretch                                                                   | ~    | No                      | 0.33     | ~         | ~                       | 4         |

**Table S3** Optical parameters of CsPbBr<sub>3</sub> NR@PS nanofiber membranes prepared with different magnetic field strengths

| Sample | Absorption   |                        |                 |              |                        |                       |                        |                       |                        |                       |                          |
|--------|--------------|------------------------|-----------------|--------------|------------------------|-----------------------|------------------------|-----------------------|------------------------|-----------------------|--------------------------|
|        | Peak<br>(nm) | E <sub>g</sub><br>(eV) | PL Peak<br>(nm) | FWHM<br>(nm) | τ <sub>1</sub><br>(ns) | A <sub>1</sub><br>(%) | τ <sub>2</sub><br>(ns) | A <sub>2</sub><br>(%) | τ <sub>3</sub><br>(ns) | A <sub>3</sub><br>(%) | τ <sub>avg</sub><br>(ns) |
| 0 mT   | 537.6        | 2.347                  | 516.3           | 23.01        | 5.81                   | 65.97                 | 20.57                  | 30.10                 | 123.61                 | 3.93                  | 50.44                    |
| 30 mT  | 540.3        | 2.342                  | 516.0           | 23.06        | 5.85                   | 66.00                 | 19.93                  | 30.38                 | 121.17                 | 3.62                  | 47.16                    |
| 80 mT  | 540.6        | 2.337                  | 517.2           | 23.05        | 5.31                   | 63.26                 | 18.67                  | 32.59                 | 110.69                 | 4.15                  | 45.60                    |
| 150 mT | 540.3        | 2.340                  | 516.4           | 22.91        | 5.67                   | 63.07                 | 18.52                  | 33.38                 | 117.41                 | 3.55                  | 44.82                    |

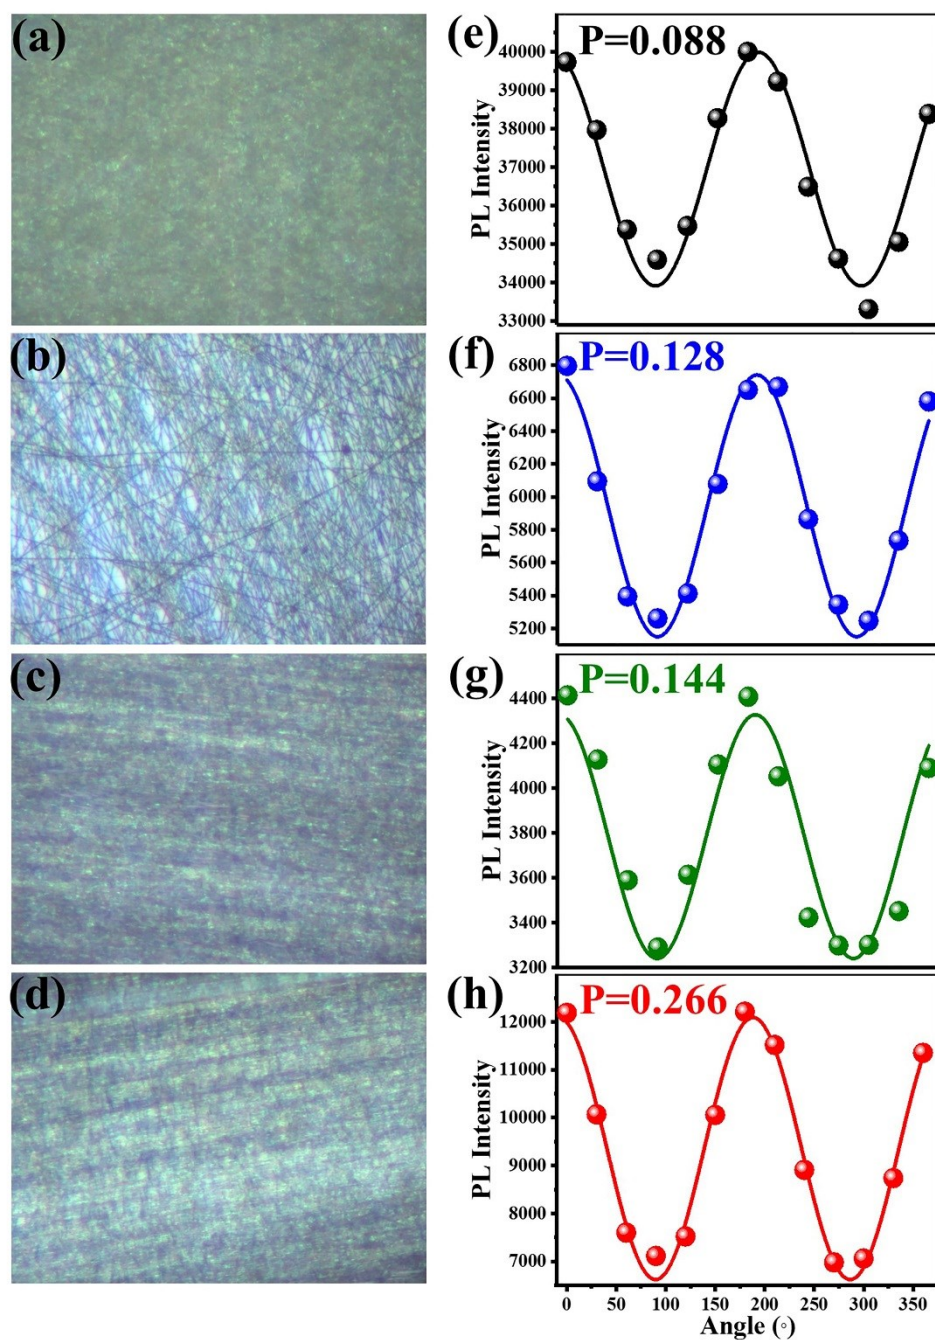

**Fig. S4** (a-d) Micrographs of CsPbBr<sub>3</sub> NR@PS membranes prepared with different magnetic field strengths; (e-h) polarization anisotropy of the emission of CsPbBr<sub>3</sub> NR@PS nanofiber membranes prepared with different magnetic field strengths. (a, e): 0 mT; (b, f): 30 mT; (c, g): 80 mT; (d, h): 150 mT.



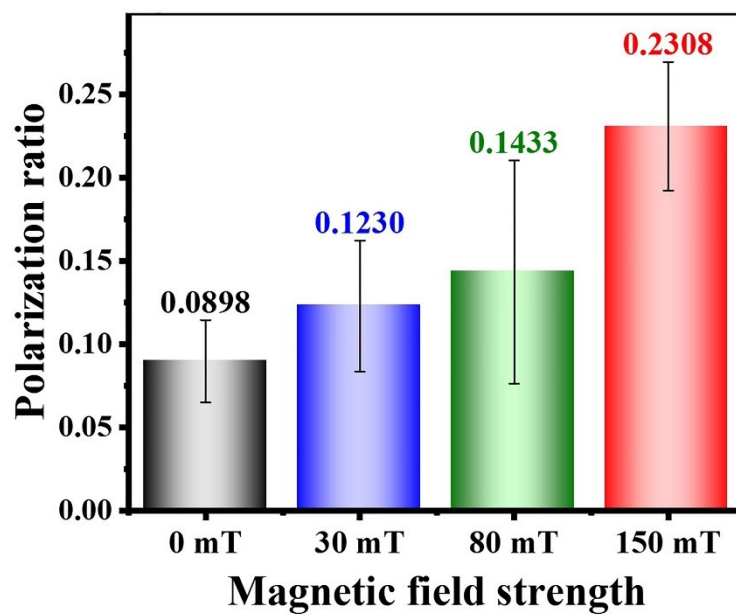

**Fig. S5** The histograms of the average polarization ratios of the aligned CsPbBr<sub>3</sub> NR@PS nanofiber membranes prepared with different magnetic field strengths.

**Table S4** The polarization ratios of the CsPbBr<sub>3</sub> NRs obtained theoretically with different magnetic field strengths

| <b>Sample</b> | $\epsilon_{(\text{CsPbBr}_3)}$ | $\epsilon_{(\text{PS})}$ | <b>AR</b> | $P_{\text{experiment}}$ | $P_{\text{em-theory}}$ | $P_{\text{ex-theory}}$ |
|---------------|--------------------------------|--------------------------|-----------|-------------------------|------------------------|------------------------|
| 0 mT          | 6.35                           | 2.45                     | 6.87      | 0.0898                  | 0.206                  | 0.473                  |
| 30 mT         | 6.35                           | 2.45                     | 7.69      | 0.1230                  | 0.215                  | 0.482                  |
| 80 mT         | 6.35                           | 2.45                     | 9.16      | 0.1433                  | 0.227                  | 0.492                  |
| 150 mT        | 6.35                           | 2.45                     | 10.66     | 0.2308                  | 0.236                  | 0.499                  |

### The calculation process of theoretical luminance polarization ratios:

Due to the experimental preparation of perovskite nanocrystals with larger AR, the physical model of dielectric confinement effects compared with quantum confinement effects is more suitable for describing the polarization optical performance of CsPbBr<sub>3</sub> NR@PS fiber membrane. The polarization emission ( $P_{em}$ ) and polarization excitation ( $P_{ex}$ ) of CsPbBr<sub>3</sub> NR@PS nanofibers can be calculated by the dielectric ellipsoid model,<sup>2</sup> which described as follows:

$$P_{em} = \frac{9(k^2 - 1)^2}{23k^4 + 34k^2 + 3} \quad (1)$$

$$P_{ex} = \frac{1 - k^2}{1 + k^2} \quad (2)$$

where  $k$  is the ratio of field strength between the major and minor axes of CsPbBr<sub>3</sub> NRs and can be calculated as

$$k = \frac{\varepsilon_1 + (\varepsilon_2 - \varepsilon_1)n_{//}}{\varepsilon_1 + (\varepsilon_2 - \varepsilon_1)n_{\perp}} \quad (3)$$

where  $\varepsilon_1$  and  $\varepsilon_2$  represent the dielectric constant of PS and CsPbBr<sub>3</sub> NRs, respectively.  $n_{//}$  and  $n_{\perp}$  can be described by the major ( $c$ ) and minor axes ( $a$ ) of the ellipsoid as following

$$n_{//} = \frac{1 - \left(\sqrt{1 - \frac{a^2}{c^2}}\right)^2}{2 \left(\sqrt{1 - \frac{a^2}{c^2}}\right)^3} \left( \ln \frac{1 + \sqrt{1 - \frac{a^2}{c^2}}}{1 - \sqrt{1 - \frac{a^2}{c^2}}} - 2\sqrt{1 - \frac{a^2}{c^2}} \right) \quad (4)$$

$$n_{\perp} = \frac{1}{2}(1 - n_{//}) \quad (5)$$

**Reference:**

1. H. Zhang, D. Fu, Z. Du, H. Fu, G. Shao, W. Yang and J. Zheng, *Ceram. Int.*, 2020, **46**, 18352-18357.
2. L. Meng, C. Yang, J. Meng, Y. Wang, Y. Ge, Z. Shao, G. Zhang, A. L. Rogach and H. Zhong, *Nano Res.*, 2019, **12**, 1411-1416.
3. T. Guner, G. Topcu, U. Savaci, A. Genc, S. Turan, E. Sari and M. M. Demir, *Nanotechnology*, 2018, **29**, 135202.
4. W.-G. Lu, X.-G. Wu, S. Huang, L. Wang, Q. Zhou, B. Zou, H. Zhong and Y. Wang, *Adv. Opt. Mater.*, 2017, **5**, 1700594.
